# Supplementary material
Source: MDPI journal article supplement (https://www.mdpi.com/2313-0105/10/1/5)
Supplement: s1 [file s1]

## Supporting Information

### **Secondary High-Temperature Treatment of Porous Carbons for High-Performance Supercapacitors**

*Weihao Chi, Guanwen Wang, Zhipeng Qiu, Qiqi Li, Zheng Xu, Zhiyuan Li, Bin Qi, Ke Cao, Chunlei Chi\*, Tong Wei, and Zhuangjun Fan\**

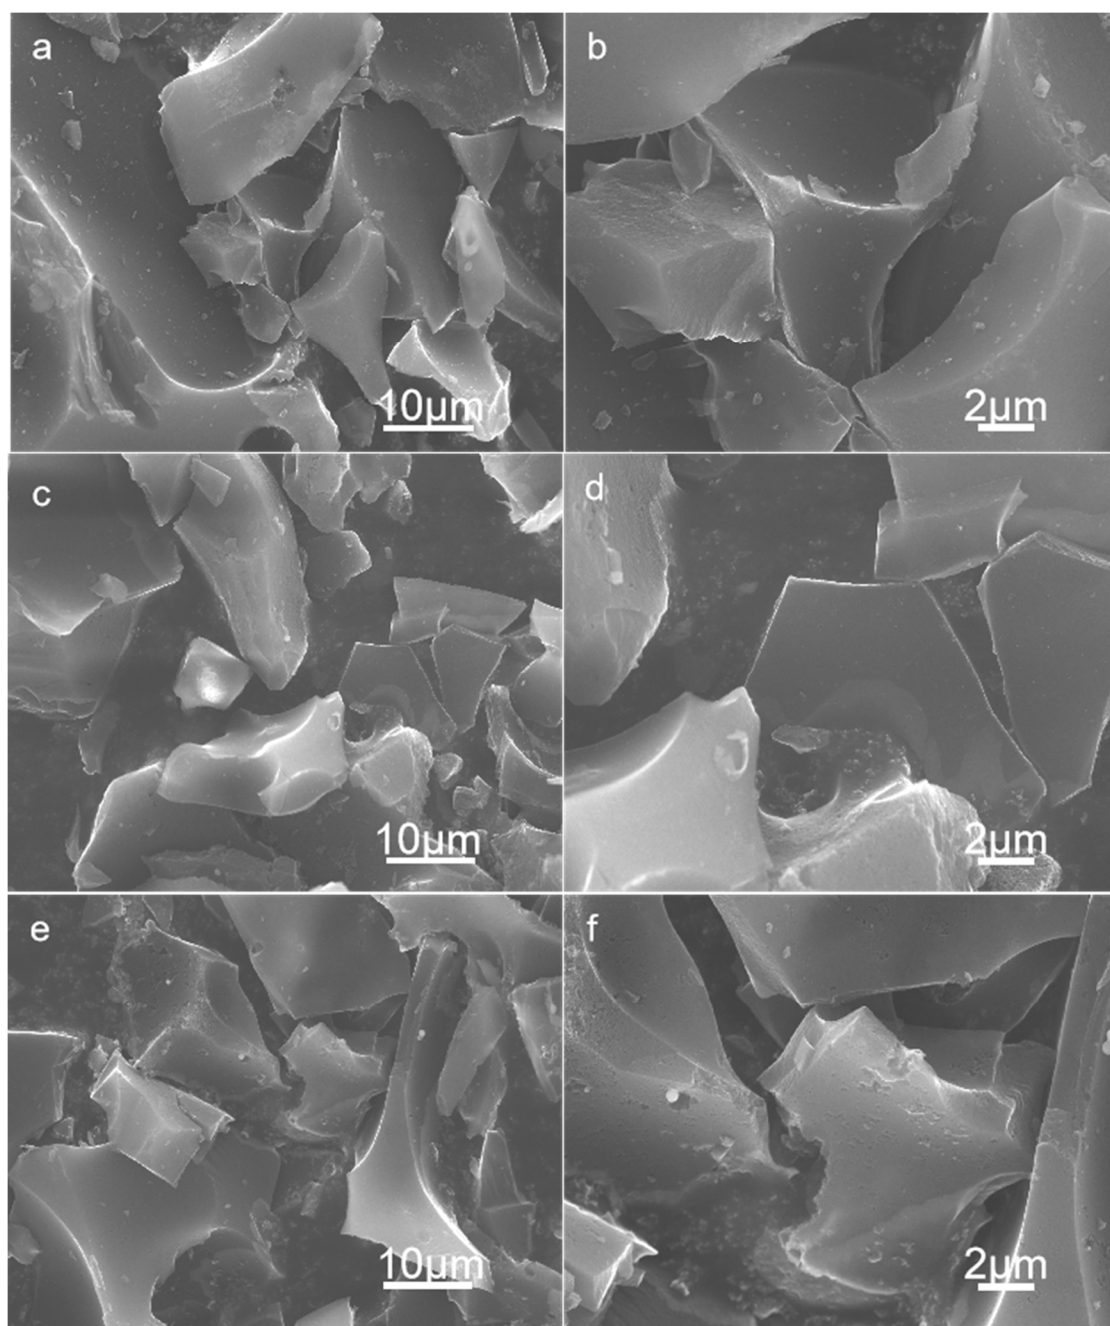

**Figure S1.** SEM images of (a-b) HTC-0, (c-d) HTC-1000, (e-f) HTC-1100.

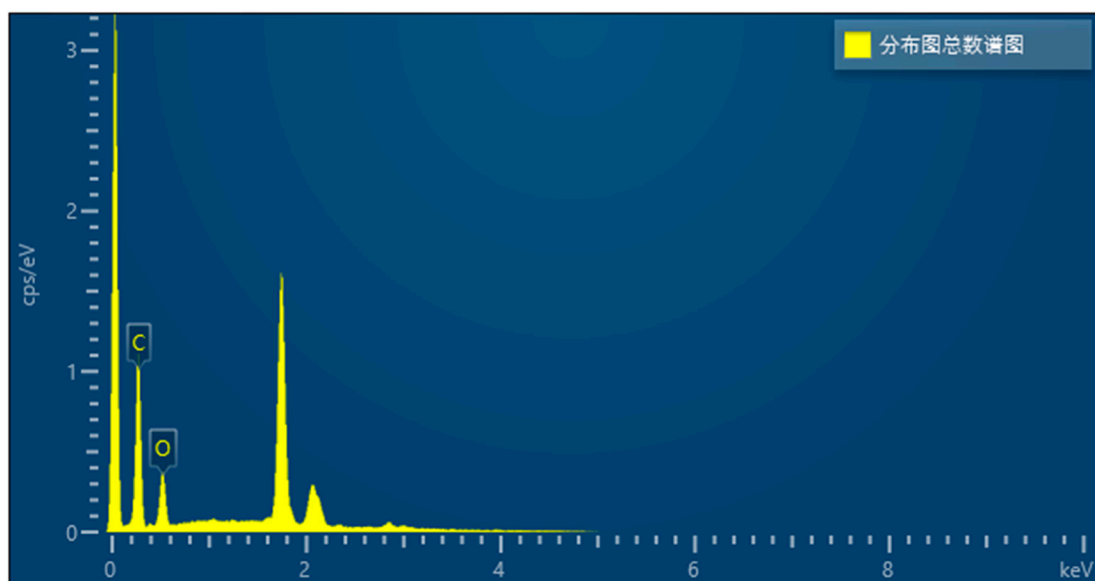

**Figure S2.** The EDS spectrum of HTC-1000. (分布图总数谱图: Total number of distribution plots Spectrum)

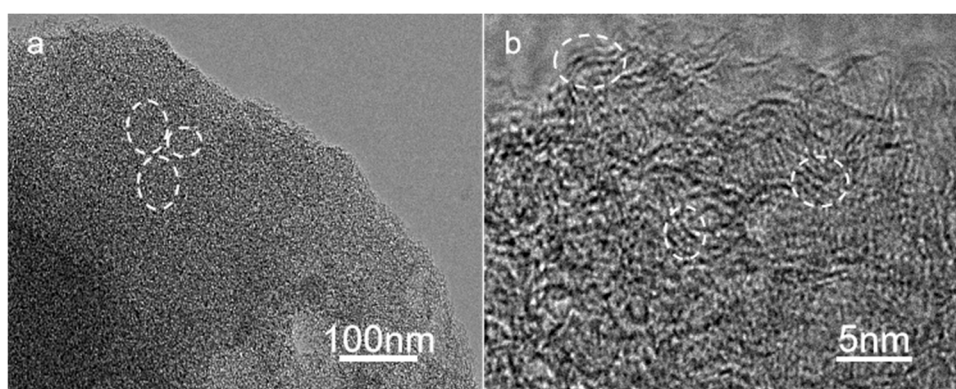

**Figure S3.** (a) TEM images of HTC-1000 and (b) HRTEM images of HTC-1000.

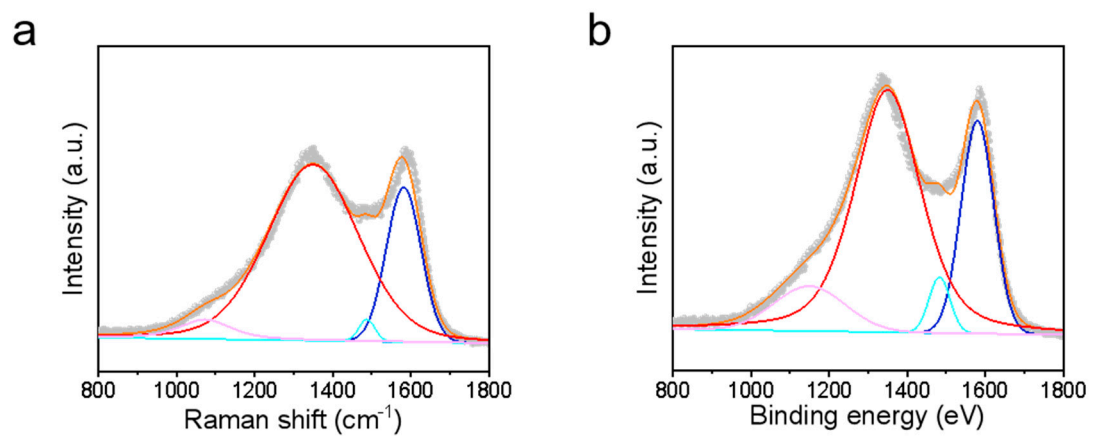

**Figure S4.** Raman spectra of (a) HTC-0 and (b) HTC-1100.

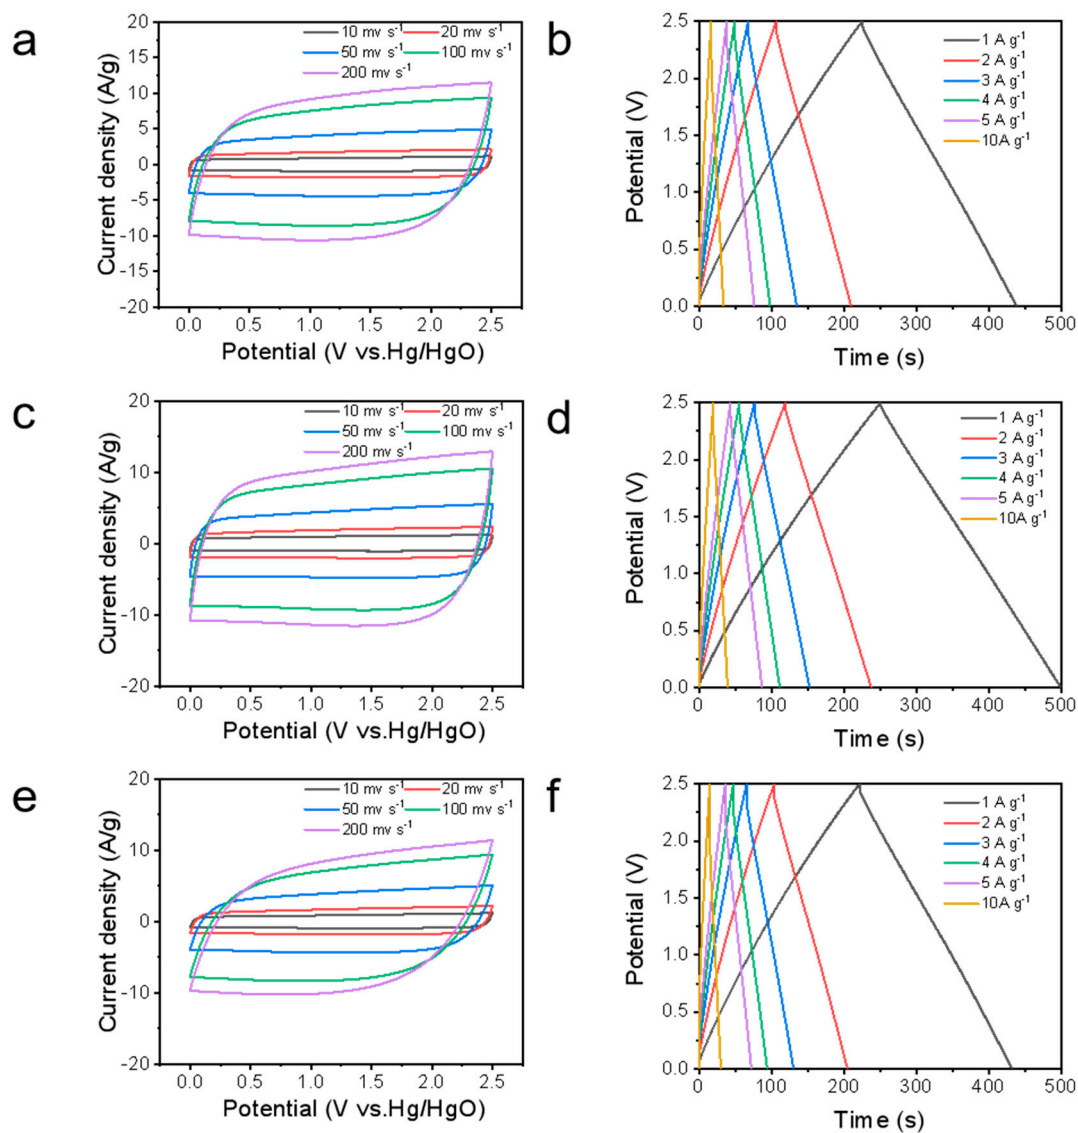

**Figure S5.** CV curves at different scan rates and galvanostatic charge–discharge curves at different current densities of (a-b) HTC-0, (c-d) HTC-1000, (e-f) HTC-1100.

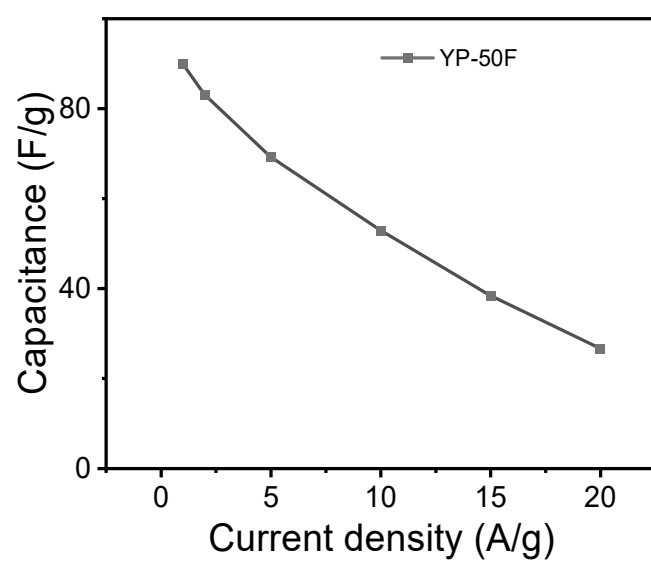

**Figure S6.** Gravimetric capacitance of YP-50F.

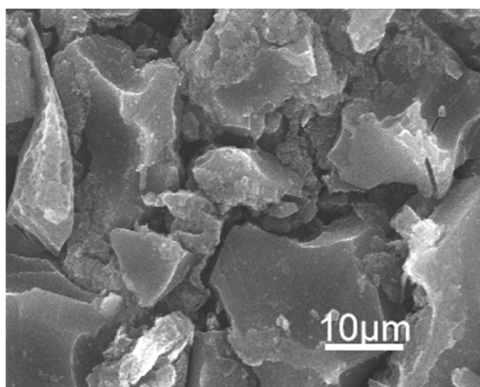

**Figure S7.** SEM images of HTC-1000 after cycling.



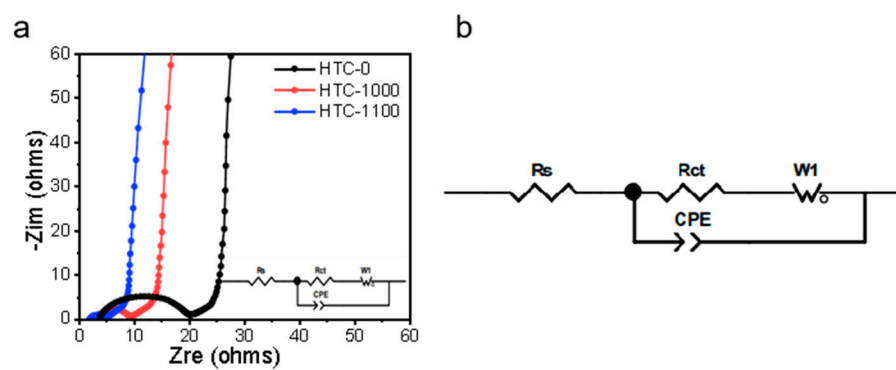

**Figure S8.** (a) Nyquist plots of HTC-0, HTC-1000, and HTC-1100. (b) The equivalent electrical circuit.

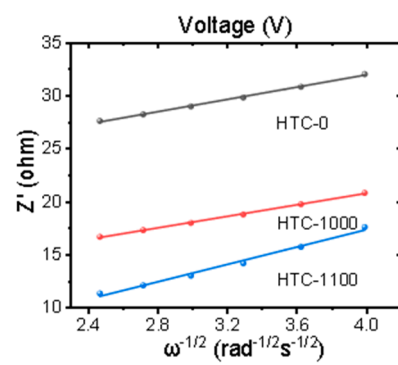

**Figure S9.** Line plots between  $Z'$  and  $\omega^{-1/2}$ .

**Table S1.** Texture properties of HTC<sub>s</sub> measured by N<sub>2</sub> adsorption–desorption isotherms.

| Sample name | S <sub>BET</sub><br>(m <sup>2</sup> g <sup>-1</sup> ) | V <sub>total</sub><br>(cm <sup>3</sup> g <sup>-1</sup> ) | V <sub>micro</sub><br>(cm <sup>3</sup> g <sup>-1</sup> ) | V <sub>meso</sub><br>(cm <sup>3</sup> g <sup>-1</sup> ) |
|-------------|-------------------------------------------------------|----------------------------------------------------------|----------------------------------------------------------|---------------------------------------------------------|
| HTC-0       | 3156                                                  | 2.02                                                     | 1.27                                                     | 0.75                                                    |
| HTC-1000    | 3333                                                  | 2.59                                                     | 1.24                                                     | 1.35                                                    |
| HTC-1100    | 2467                                                  | 1.69                                                     | 0.95                                                     | 0.74                                                    |

**Table S2.** Peaks attribution in FTIR spectra of porous carbons.

| Wave numbers ( $\sigma/\text{cm}^{-1}$ ) | Corresponding groups                         |
|------------------------------------------|----------------------------------------------|
| 3700                                     | -OH                                          |
| 2850~2950                                | -CH <sub>2</sub> connected to aromatic rings |
| 1600                                     | C=C of aromatic rings                        |
| 700                                      | -CH of aromatic rings                        |
| 1200、1700~1750                           | C=O in aldehyde, ketone, ester, and carboxyl |
| 1500                                     | -CH <sub>3</sub> of aromatic rings           |

**Table S3.** Specific capacitance of HTC-0, HTC-1000, HTC-1100, and YP-50F.

| Sample   | Current density |                     |                     |                     |                      |                      |                      |
|----------|-----------------|---------------------|---------------------|---------------------|----------------------|----------------------|----------------------|
|          |                 | 1 A g <sup>-1</sup> | 2 A g <sup>-1</sup> | 5 A g <sup>-1</sup> | 10 A g <sup>-1</sup> | 15 A g <sup>-1</sup> | 20 A g <sup>-1</sup> |
| HTC-0    |                 | 170                 | 165                 | 152                 | 135                  | 120                  | 107                  |
| HTC-1000 |                 | 199                 | 189                 | 173                 | 158                  | 146                  | 136                  |
| HTC-1100 |                 | 168                 | 161                 | 143                 | 120                  | 99                   | 80                   |
| YP-50F   |                 | 90                  | 83                  | 69                  | 53                   | 38                   | 26                   |

**Table S4.** Fitting experimental resistances of HTC electrodes.

| Sample   | $R_s$ ( $\Omega$ ) | $R_{ct}$ ( $\Omega$ ) |
|----------|--------------------|-----------------------|
| HTC-0    | 3.6                | 16.2                  |
| HTC-1000 | 3.3                | 5.7                   |
| HTC-1100 | 2.1                | 2.5                   |

**Table S5.** Electrochemical performance comparison between the HTC-1000//  
HTC-1000 symmetric device and other devices.

| Ref.      | Energy density         | Power density             |
|-----------|------------------------|---------------------------|
| This work | 41 Wh kg <sup>-1</sup> | 1250 kW kg <sup>-1</sup>  |
| This work | 11 Wh kg <sup>-1</sup> | 43750 kW kg <sup>-1</sup> |
| [46]      | 6 Wh kg <sup>-1</sup>  | 4000 kW kg <sup>-1</sup>  |
| [49]      | 31 Wh kg <sup>-1</sup> | 300 kW kg <sup>-1</sup>   |
| [50]      | 2 Wh kg <sup>-1</sup>  | 10000 kW kg <sup>-1</sup> |
| [51]      | 14 Wh kg <sup>-1</sup> | 500 kW kg <sup>-1</sup>   |
| [52]      | 19 Wh kg <sup>-1</sup> | 300 kW kg <sup>-1</sup>   |
| [53]      | 10 Wh kg <sup>-1</sup> | 12000 kW kg <sup>-1</sup> |
| [54]      | 18 Wh kg <sup>-1</sup> | 700 kW kg <sup>-1</sup>   |
| [55]      | 11 Wh kg <sup>-1</sup> | 35000 kW kg <sup>-1</sup> |
| [56]      | 6 Wh kg <sup>-1</sup>  | 26000 kW kg <sup>-1</sup> |
| [57]      | 8 Wh kg <sup>-1</sup>  | 250 kW kg <sup>-1</sup>   |
| [58]      | 7 Wh kg <sup>-1</sup>  | 265 kW kg <sup>-1</sup>   |
